# Supplementary material for: Mild dyslipidemia accelerates tumorigenesis through expansion of Ly6Chi monocytes and differentiation to pro-angiogenic myeloid cells
Source: PubMed Central journal article supplement (PMC9475043; doi:10.1038/s41467-022-33034-0), 2022-09-14
Supplement: 41467_2022_33034_MOESM1_ESM.pdf [file 41467_2022_33034_MOESM1_ESM.pdf]

**a**

**Blood**

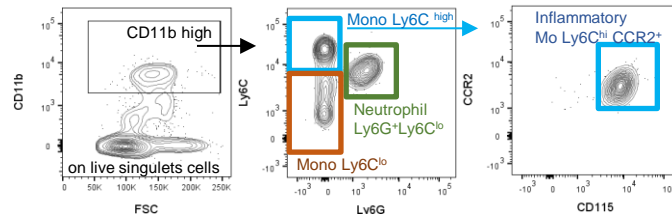

**b**

**Spleen**

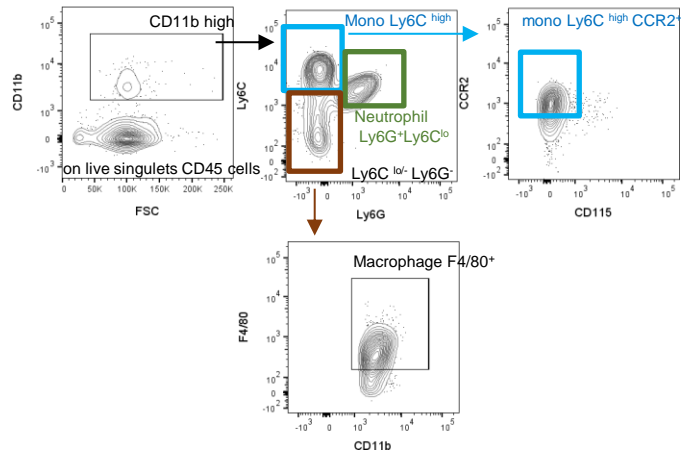

**Supplementary Figure 1: Flow cytometry gating strategy**

Flow cytometry gating strategy for myeloid subsets in **a)** blood and **b)** spleen.

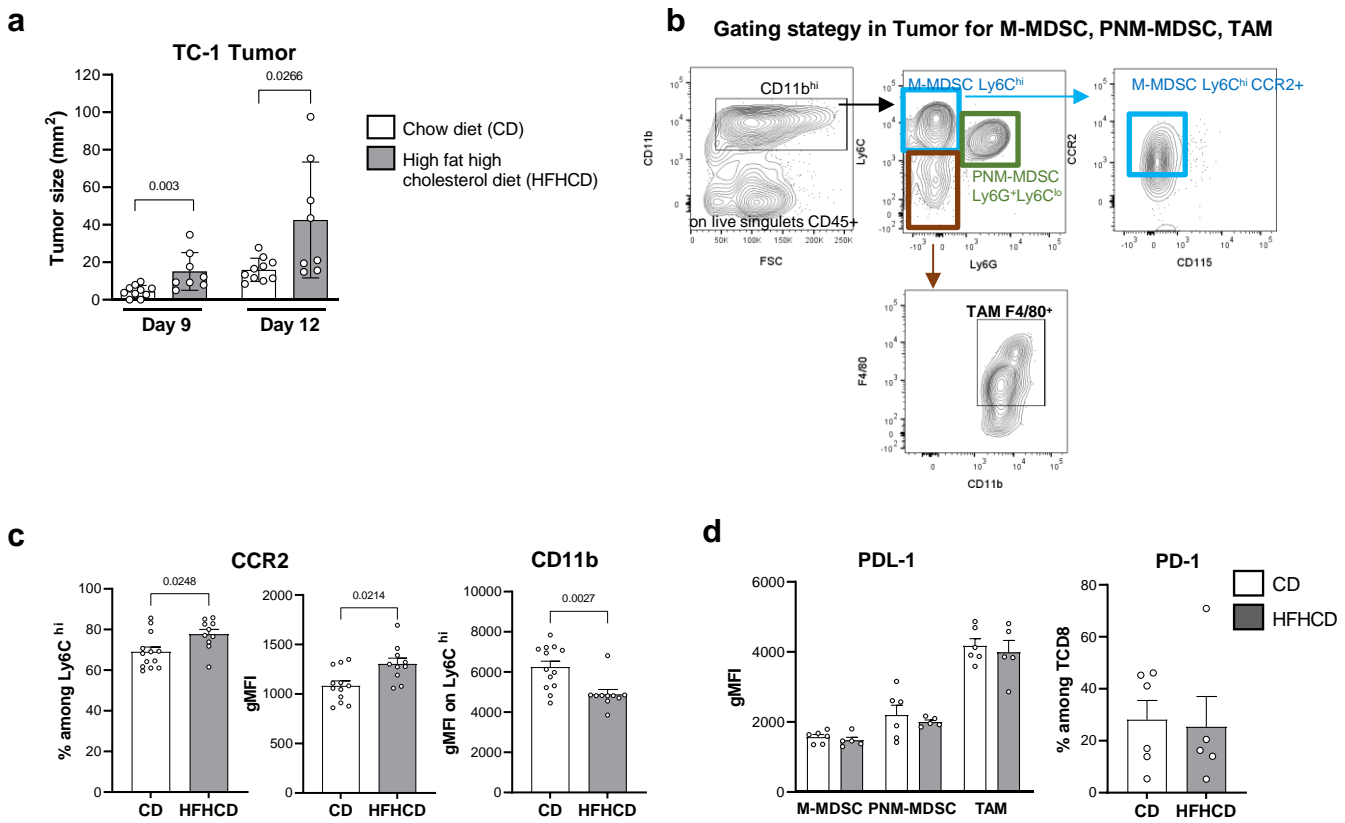

**Supplementary Figure 2: Pro-atherogenic HFHCD accelerates B16-F10 melanoma growth in C57BL/6J mice**

**a**) C57BL/6J mice were fed for 2 weeks with CD (n=10) or HFHCD (n=8), then grafted with TC-1 tumor cells (10<sup>5</sup> cells s.c). TC-1 tumor size (8-10 mice/group, pool of 2 independent experiments) **b-d**) C57BL/6J mice were fed for 2 weeks with CD or HFHCD, then grafted with B16-F10 tumor cells **b**) Flow cytometry gating strategy in the tumor for M-MDSC (CD11b<sup>+</sup>Ly6C<sup>hi</sup>), PNM-MDSC (CD11b<sup>+</sup>Ly6C<sup>lo</sup> Ly6G<sup>+</sup>) and TAM (CD11b<sup>+</sup>Ly6C<sup>lo</sup> Ly6G<sup>-</sup> F4/80<sup>+</sup>). **c**) Flow cytometry analysis of expression of CCR2 (gMFI and %) (*left*) and CD11b among M-MDSC Ly6C<sup>hi</sup> in the tumor (*right*), n=13 in CD group, n=10 in HFHCD group. **d**) Flow cytometry analysis of expression of PDL1 (gMFI) among M-MDSC, PNM-MDSC and TAM (*left*), and PD-1 (%) among CD8 T cells in the tumor (*right*), n=6 in CD group, n=5 in HFHCD group. Data are expressed as mean±sem. Analysis of difference within groups were performed with two-sided Mann-Whitney t-test. Source data are provided as a Source Data file.

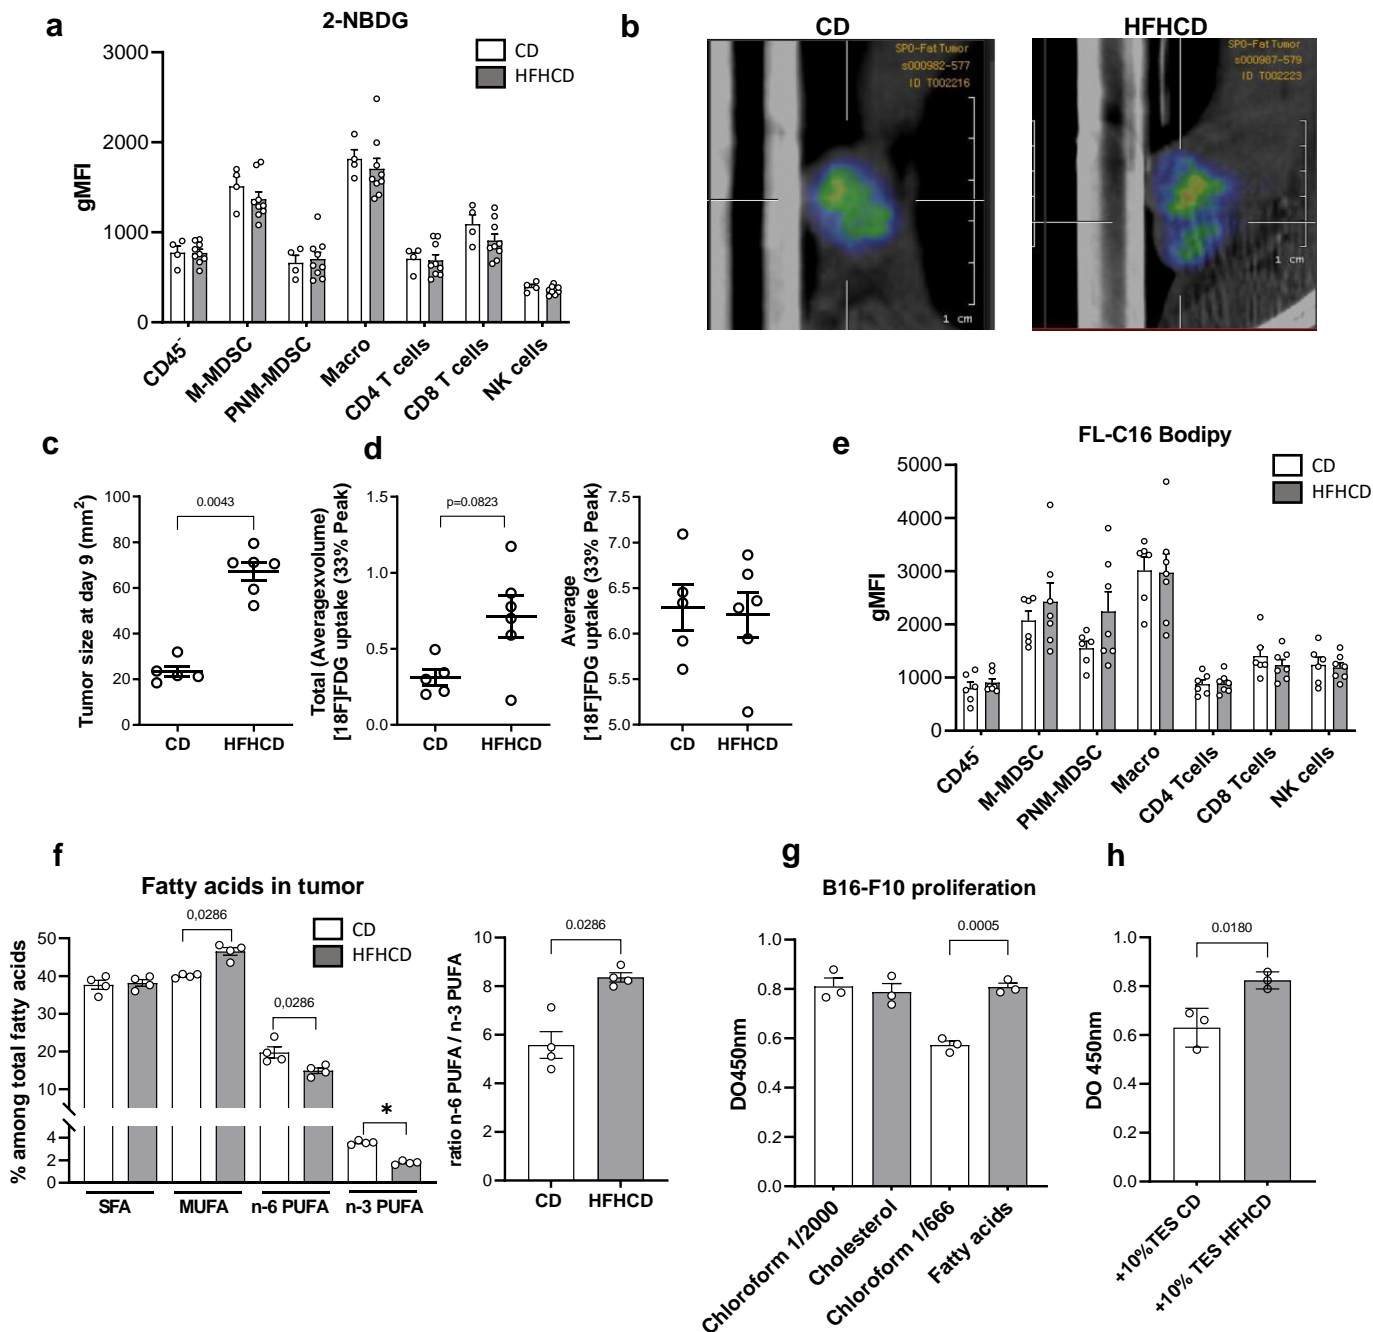

### Supplementary Figure 3: Effect of HFHCD on metabolism and proliferation of tumor cells

C57BL/6J mice were fed for 2 weeks with CD or HFHCD, then grafted with B16-F10 cells ( $0.25 \times 10^6$  cells s.c.) at D13-15 after tumor graft, mice were fasten overnight, then injected with an analogue of glucose 2-NBDG ( $200 \mu\text{g}$  iv) 15min before sacrifice,  $n=4$  in CD,  $n=9$  in HFHCD. **b-d**) *in vivo* <sup>18</sup>F FDG-PET monitoring in tumor bearing mice ( $n=5$  in CD and  $n=6$  in HFHCD group) day 9 post tumor cell injection, **b**) representative picture. **c**) tumor size **d**) <sup>18</sup>F FDG total captation (left) and average captation (right) are shown, **e**) at D13-15 after tumor graft, mice were fasten overnight, then injected with FL-C16-BODIPY ( $50 \mu\text{g}$  ip), mice were sacrificed 1h before sacrifice. Quantification of *in vivo* uptake of 2-NBDG or FL-C16-BODIPY (gMFI) by CD45 negative cells and main subset leukocytes infiltrating tumor was analyzed by flow cytometry. **f**) Composition (%) of Saturated fatty acids (SFA), Mono-unsaturated fatty acid (MUFA), Poly-unsaturated *n*-6 fatty acid (*n*-6 PUFA), Poly-unsaturated *n*-3 fatty acid (*n*-3 PUFA) and ratio *n*-6 PUFA / *n*-3 PUFA in tumor by Gas chromatography with flame ionization detector (GC/FID). % of total SFA, MUFA, PUFA, was calculated by the sum of all FA of each family (please see details in supplementary table 2) ( $n=4$  mice/group). The data generated in this study have been deposited in the Open Science Framework database under the DOI DOI 10.17605/OSF.IO/TE8S2. **g-h**) *in vitro* proliferation of B16-F10 cell ( $4 \times 10^3$  cells/ well) cultured 72h in medium supplemented with **g**) cholesterol ( $50 \mu\text{g}/\text{ml}$ ) or control (Chloroform 1/2000), or with a mix of oleic, palmitic and stearic acid ( $50 \mu\text{M}$  each) or control (Chloroform 1/666) or **h**) with 10% of tumor explant supernatant (TES) from CD or HFHCD tumor ( $n=3$  mice/group) (unpaired t-tests). Proliferation was measured by WST-1 colorimetric assay. Datas are expressed as mean  $\pm$  sem. Analysis of difference within groups were performed with two-sided Mann-Whitney t-test. Source data are provided as a Source Data file.

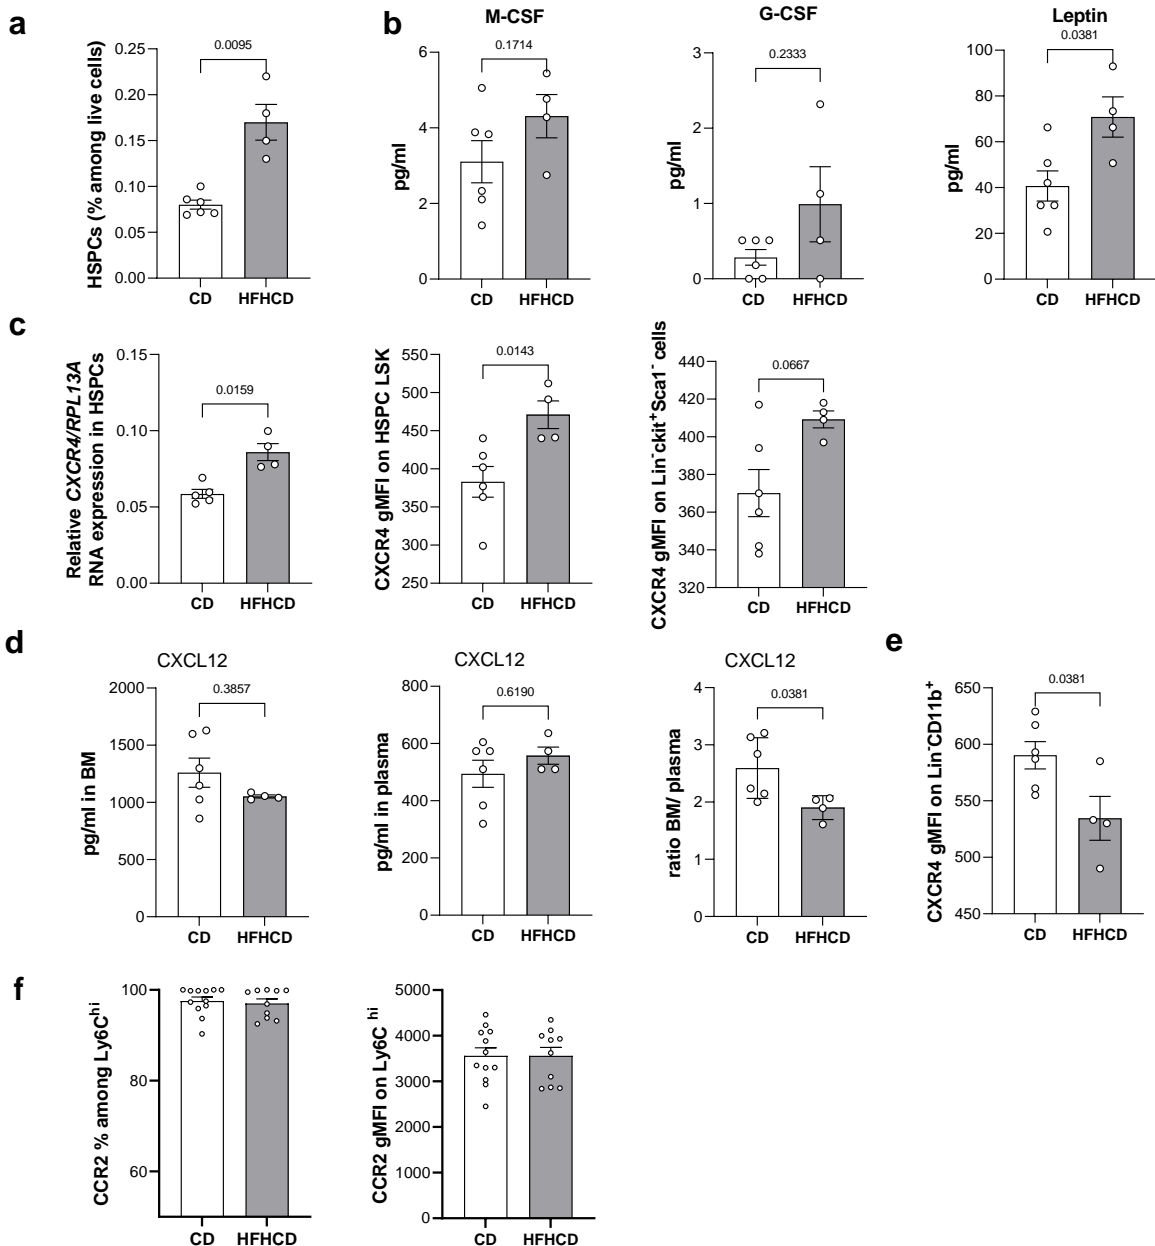

**Supplementary Figure 4 : HFHCD stimulates the production and retention of HSPCs and favors the exit of monocytes from the bone marrow**

C57BL/6J mice were fed for 2 weeks with CD (n=6 mice) or HFHCD (n=4 mice). **a**) Flow cytometry analysis of bone marrow HSPC level (Lin<sup>-</sup>CD11b<sup>-</sup> ckit<sup>+</sup>Sca1<sup>+</sup>). **b**) cytokines were measured in bone marrow by bead-based multiplex immunoassay. **c**) relative expression of Cxcr4 mRNA in HSPC isolated from bone marrow and expression of CXCR4 (gMFI) analyzed by flow cytometry in HSPC and myeloid progenitors (Lin<sup>+</sup>ckit<sup>+</sup>Sca1<sup>-</sup>). **d**) CXCL12 production in the bone marrow and the plasma (multiplex assay). **e**) expression of CXCR4 (gMFI) in mature CD11b<sup>+</sup> cells in bone marrow. **f**) CCR2 expression level on blood Ly6C<sup>hi</sup> monocytes of mice on CD (n=12) and HFHCD (n=10). Data are expressed as mean±sem. Two-sided Mann-Whitney t-test. Source data are provided as a Source Data file.

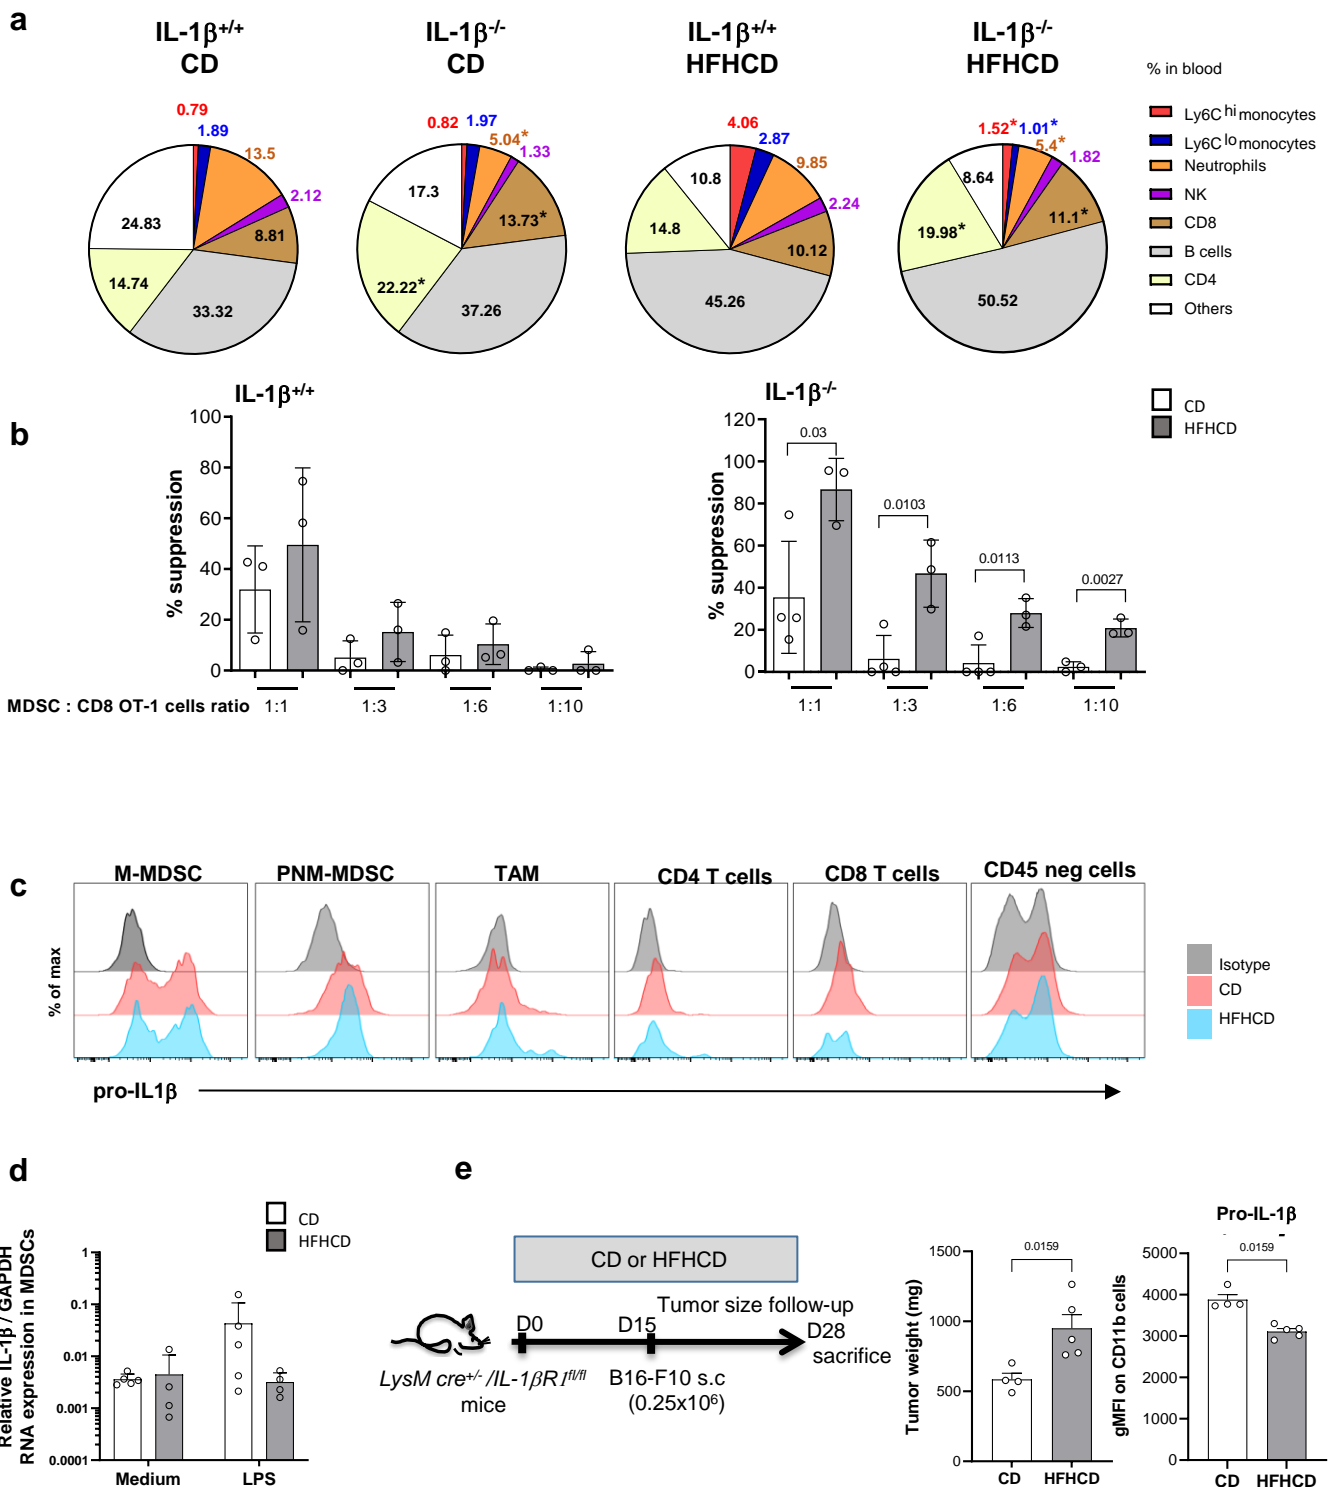

**Supplementary Figure 5 : Impaired myeloid cell accumulation in the tumor limits tumor growth under HFHCD.**  
**(a-b)** IL-1β<sup>-/-</sup> mice and control IL-1β<sup>+/+</sup> mice were fed for 2 weeks with CD or HFHCD, then were transplanted with 0,25x10<sup>6</sup> B16-F10 cells (s.c). Mice were sacrificed at day 15 post injection. **a)** Proportion of immune cells in blood are shown in the pie chart (n=5/group), statistical difference between the 2 groups, for the same leukocyte subset, was mentioned on the pie chart by \* p<0,05. **b)** Suppressive activity of myeloid-derived suppressor cells (MDSC), isolated from spleen of IL-1β<sup>-/-</sup> and IL-1β<sup>+/+</sup> tumor-bearing mice, evaluated by CFSE dilution of CD8<sup>+</sup> OT-I T cells incubated with OVA<sub>257-264</sub> (SIINFEKL, 0,001 μg/ml). Proliferation was measured after 72 hours by flow cytometry. (n=3/group except IL-1β<sup>-/-</sup> on CD n=4; from 1 representative experiment of 2). **c)** Flow cytometry analysis of pro-IL1β expression (gMFI) among M-MDSCs, PNM-MDSCs, TAMs, CD4 T cells, CD8 T cells and CD45 negative cells in tumor CD or HFHCD. **d)** Relative expression of IL-1β mRNA in MDSCs isolated from tumor CD (n=5) or HFHCD (n=4) and stimulated overnight or not with LPS (1 μg/ml). **e)** Mice with specific deletion of IL-1β receptor in myeloid cells (*LysM<sup>cre+/+</sup> / IL-1R1<sup>fl/fl</sup>*) were fed for 2 weeks with CD (n=4) or HFHCD (n=5), and transplanted with B16-F10 cells (s.c). (*left*) Experimental design, (*middle*) Tumor weight at day 14 post tumor graft and (*right*) flow cytometry analysis of pro-IL1β expression (gMFI) among CD11b<sup>+</sup> myeloid cells in the tumor. (n=4-5 mice/group from 1 representative experiment). Data are expressed as mean±sem. Two-sided Mann-Whitney t-test. Source data are provided as a Source Data file.

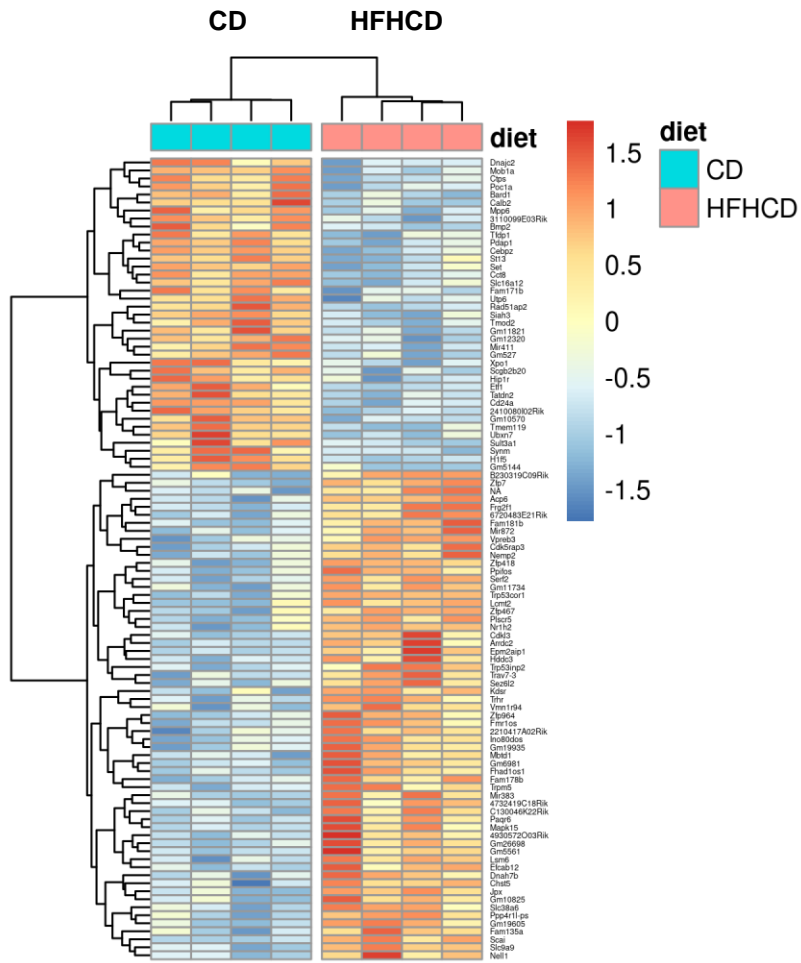

**Supplementary Figure 6 : Transcriptomic analysis of melanoma tumors from CD versus HFHCD-treated mice.**

Heatmap of top 100 genes differentially expressed between CD or HFHCD diet at day 9 post B16-F10 cell injection (n=4 mice/group). P-values were obtained by Student's t-test with group variance within limma package. The data generated in this study have been deposited in the Open Science Framework database under the DOI DOI 10.17605/OSF.IO/TE8S2

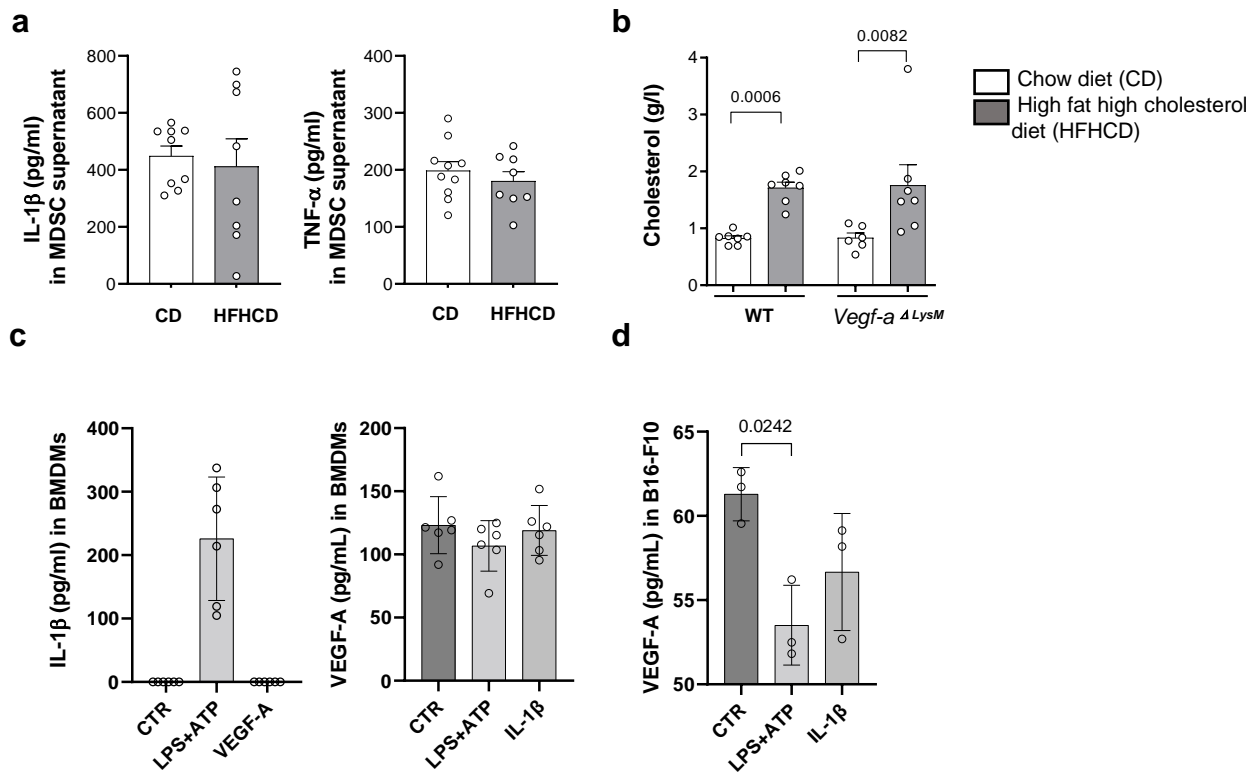

### Supplementary figure 7: Myeloid-derived VEGF-A controls tumor growth under HFHCD

C57BL/6J mice, fed with CD or HFHCD and grafted with B16-F10 cells **a**) MDSCs were isolated from B16-F10 tumors at day 13 after tumor graft, and cultured for 18h in complete medium. IL-1 $\beta$  and TNF- $\alpha$  were measured by bead-based multiplex immunoassay in the supernatant (n=10 mice on CD and n=8 mice on HFHCD). **b**) *LysMCre<sup>+/-</sup> Vegf-a<sup>ff</sup>* (*Vegf-a* <sup>$\Delta$ LysM</sup>) and their control littermate *LysMCre<sup>-/-</sup> Vegf-a<sup>ff</sup>* (WT), fed with CD or HFHCD for 2 weeks, were transplanted subcutaneously with 0,25x10<sup>6</sup> B16-F10 cells. Total cholesterol level in plasma measured by colorimetric assay. n=7 mice/group except for n=6 in *Vegf-a* <sup>$\Delta$ LysM</sup> mice on CD. **c**) Bone-marrow-derived macrophages from C57Bl/6J WT (n=6) mice were stimulated with LPS (100ng/ml) + ATP (5mM), VEGF-A (50ng/ml), IL-1 $\beta$  (50ng/ml), or unstimulated (CTR) for 24h. IL1 $\beta$  (*left*) and VEGF-A (*right*) were measured in the supernatant by ELISA (n=6/group). **d**) B16-F10 cells were stimulated *in vitro* with LPS+ATP or with IL-1 $\beta$  or unstimulated (CTR) for 24h (same concentrations). VEGF-A were measured in the supernatant by ELISA (n=3 independent experiments). Data are expressed as mean $\pm$ sem. Analysis of difference within groups were performed with Two-sided Mann-Whitney t-test (a-b), and with one-way ANOVA with Bonferroni's multiple adjustment test (c-d). Source data are provided as a Source Data file.

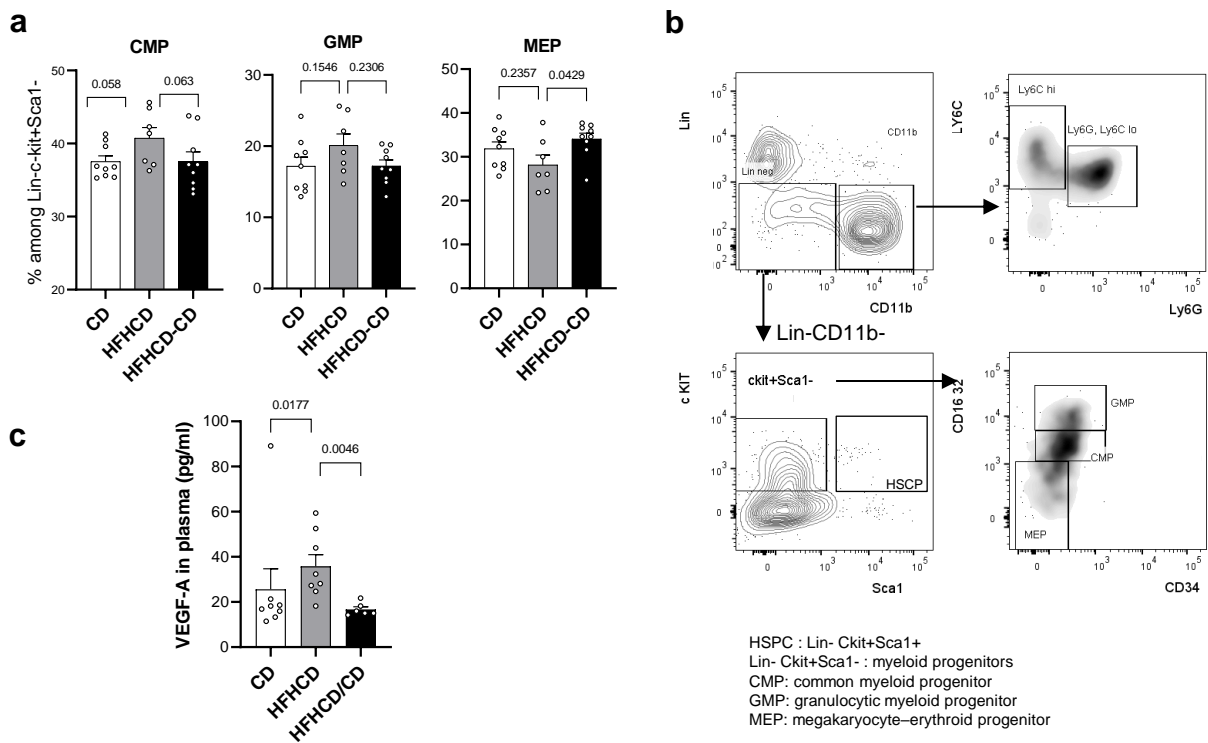

**Supplementary Figure 8: Switching diet avoid the effect of HFHCD on tumor growth**

C57BL/6J mice were fed for 2 weeks with CD or HFHCD, one group HFHCD was switched to CD the day of tumor graft. Mice were transplanted with B16-F10 cells (s.c) and sacrificed at day 12 post injection. **a)** Flow cytometry analysis of bone marrow myeloid progenitors (CMP: common myeloid progenitor; GMP: granulocytic myeloid progenitor; MEP: megakaryocyte-erythroid progenitor). (n=9 in CD group, n=7 in HFHCD group, n=9 in HFHCD-CD group). **b)** Gating strategy for analysis of bone marrow myeloid progenitors, monocytes and neutrophils. **c)** VEGF-A level in plasma was measured by bead-based multiplex immunoassay. (n=8 in CD group, n=8 in HFHCD group, n=6 in HFHCD-CD group). . Data are expressed as mean  $\pm$  s.e.m., one-way ANOVA with Tukey's multiple comparison test. Source data are provided as a Source Data file.



**Diet nutritional composition**

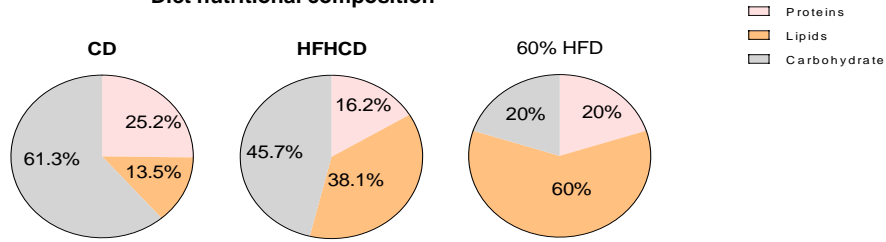

| %Fatty acids | Chow Diet | HFHCD | 60% HFD |
|--------------|-----------|-------|---------|
| Palmitic     | 0.76%     | 4.07% | 7.93%   |
| Palmitoleic  | 0.05%     | 0.06% | 0.94%   |
| Stearic      | 0.15%     | 5.22% | 4.37%   |
| Oleic        | 1%        | 5.23% | 13.97%  |
| Linoleic     | 2.5%      | 1.56% | 4.64%   |
| linolenic    | 0.28%     | 0.21% | 0.49%   |
| Myristic     | -         | 0.02% | 0.44%   |
| Arachidic    | -         | 0.16% | 0.11%   |

|                      |    |       |    |
|----------------------|----|-------|----|
| <b>% cholesterol</b> | 0% | 1.25% | 0% |
|----------------------|----|-------|----|

**Supplemental table 1**

compositon (%) of fatty acids and cholesterol in CD, HFHCD and in 60% HFD  
 CD Safe, A03; HFHCD Ssniff Paigen mod., 15% cocoa butter and 1.25% cholesterol,  
 Catalog No. E15106-347; 60%HFD Ssniff DIO-60 kJ% fat, Catalog No. E15742-347

## Flow cytometry reagents and anti-mouse antibodies

|                                                  | Manufacturer      | clone       | Cat#          | Dilution and amount per test                                   |
|--------------------------------------------------|-------------------|-------------|---------------|----------------------------------------------------------------|
| FC block anti CD16/32 purified                   | eBiosciences      | 93          | 14-0101-86    | 1/100=0,5ug                                                    |
| Live/dead aquablue                               | Life Technologies | -           | L34957        | 0,5ul/test                                                     |
| Foxp3 / Transcription Factor Staining Buffer Set | eBiosciences      | -           | 00-5523-00    | Fix/Perm 1X :<br>100ul/test, Perm<br>Buffer 1X :<br>200ul/test |
| CD45 AlexaFluo700                                | eBiosciences      | 30-F11      | 56-0451-82    | 1/200=0,05ug                                                   |
| CD45 BV605                                       | BD Biosciences    | 30-F11      | 563053        | 1/200=0,05ug                                                   |
| CD11b APCefluo780                                | eBiosciences      | M1/71       | 47-0112-82    | 1/400=0,025ug                                                  |
| CD11b PECY7                                      | Biologend         | M1/71       | 101215        | 1/400=0,025ug                                                  |
| Ly6C PercpCy5.5                                  | eBiosciences      | HK4.4       | 45-5932-82    | 1/100=0,1ug                                                    |
| Ly6C BV421                                       | BD Biosciences    | AL-21       | 562727        | 1/200=0,05ug                                                   |
| Ly6G PE; AlexaFluo700                            | BD Biosciences    | 1A8         | 551461;561236 | 1/200=0,05ug                                                   |
| GR-1 Percp Cy5.5                                 | Biologend         | RB6-8C      | 108428        | 1/100=0,1ug                                                    |
| F4/80 BV421                                      | Biologend         | BM8         | 123131        | 1/75=0,13ug                                                    |
| F4/80 BUV395                                     | BD Biosciences    | T45-2342    | 565614        | 1/75=0,13ug                                                    |
| CD8a APC                                         | eBiosciences      | 56-6.7      | 17-0081-83    | 1/400=0,025ug                                                  |
| CD8b BUV495                                      | BD Biosciences    | H35-17.2    | 741127        | 1/500=0,02ug                                                   |
| CD4 APC                                          | eBiosciences      | GK1.5       | 17-0041-82    | 1/400=0,025ug                                                  |
| CD4 Pacific Blue                                 | Biologend         | RM4-5       | 100531        | 1/200=0,125ug                                                  |
| CD3e PercpCy5.5                                  | eBiosciences      | 145-2C11    | 45-0031-82    | 1/100=0,1ug                                                    |
| CD3e BUV395                                      | BD Biosciences    | 145-2C11    | 563565        | 1/100=0,1ug                                                    |
| CD25 BV711                                       | Biologend         | PC61.5      | 102049        | 1/100=0,1ug                                                    |
| CD25 APCefluo780                                 | eBiosciences      | PC61.5      | 47-0251-82    | 1/100=0,1ug                                                    |
| FoxP3 PE                                         | eBiosciences      | FJK-16s     | 12-5773-82    | 1/100=0,1ug                                                    |
| PD1 FITC                                         | eBiosciences      | J43         | 11-9985-85    | 1/100=0,25ug                                                   |
| PD-L1 APC                                        | Biologend         | 10F.9G2     | 124311        | 1/100=0,1ug                                                    |
| NK1.1 APC CY7                                    | Biologend         | PK136       | 108724        | 1/100=0,1ug                                                    |
| NK BV650                                         | BD Biosciences    | PK136       | 564143        | 1/100=0,1ug                                                    |
| CD115 BV711                                      | Biologend         | AFS98       | 135515        | 1/100=0,1ug                                                    |
| CCR2 PE                                          | Biologend         | QA18A56     | 160105        | 1/100=0,1ug                                                    |
| CX3CR1 PercpCy5.5                                | Biologend         | SA011F11    | 149009        | 1/100=0,1ug                                                    |
| CMH II APC                                       | Biologend         | M5/114.15.2 | 107614        | 1/300=0,033ug                                                  |
| CD206 PECY7                                      | Biologend         | C068C2      | 141720        | 1/50=0,2ug                                                     |
| Ki67 BV786                                       | BD Biosciences    | B56         | 563756        | 1ul/test                                                       |
| pro-IL1b FITC                                    | eBiosciences      | NJTEN3      | 11-7114-82    | 1/50=0,5ug                                                     |
| TNFa PECY7                                       | eBiosciences      | MP6-XT22    | 25-7321-82    | 1/100=0,1ug                                                    |

|                         |                   |              |            |                  |
|-------------------------|-------------------|--------------|------------|------------------|
| IL10 APC                | eBiosciences      | JES5-16E3    | 17-7101-82 | 1/50=0,2ug       |
| IL-17 PE                | Biolegend         | TC11-18H10.1 | 506904     | 1/100=0,1ug      |
| IFNg AF488              | Biolegend         | XMG1.2       | 505813     | 1/100=0,25ug     |
| Granzyme B AlexaFluo647 | Biolegend         | GB11         | 515406     | 0,1ug            |
| CD44 AlexaFluo700       | Biolegend         | IM7          | 103026     | 1/100=0,25ug     |
| CD62L PercpCy5.5        | Biolegend         | MEL-14       | 104432     | 1/100=0,1ug      |
| CD2 biotin              | Biolegend         | RM2-5        | 100103     | 1/200=0,125ug    |
| CD3e biotin             | Biolegend         | 145-2C11     | 100303     | 1/200=0,125ug    |
| CD4 biotin              | Biolegend         | GK1.5        | 100403     | 1/200=0,125ug    |
| CD19 biotin             | Biolegend         | 6D5          | 115504     | 1/200=0,125ug    |
| CD8a biotin             | Biolegend         | 56-6.7       | 100703     | 1/200=0,125ug    |
| CD45R/B220 biotin       | Biolegend         | RA3-6B2      | 103203     | 1/200=0,125ug    |
| Ter119 biotin           | Biolegend         | Ly-76        | 116203     | 1/200=0,125ug    |
| Streptavidin FITC       | Biolegend         | -            | 405201     | 1/200=0,125ug    |
| c-kit 4APC-Cy7          | Biolegend         | 2B8          | 105825     | 1/100=0,1ug      |
| Sca1 BV605              | Biolegend         | D7           | 108134     | 1/100=0,1ug      |
| CD16/32 PE              | Biolegend         | 93           | 101308     | 1/100=0,1ug      |
| CD34 Percpcy5.5         | Biolegend         | HM34         | 128607     | 1/100=0,1ug      |
| CD45.1 PE               | Biolegend         | A20          | 110708     | 1/100=0,1ug      |
| CD45.2 AlexaFluo700     | eBiosciences      | 104          | 56-0454-82 | 1/200=0,12ug     |
| CXCR4 AF488             | eBiosciences      | 2B11         | 53-9991-80 | 1/50=0,5ug       |
| Streptavidin BV650      | Biolegend         | -            | 405231     | 1/100=0,05ug     |
| BODIPY FL C16           | Life Technologies | -            | D3821      | 50ug i.p /mouse  |
| 2-NBDG                  | Life Technologies | -            | N13195     | 200ug i.v /mouse |

### Immunohistochemistry reagent and antibodies

|                                                         | Manufactor | clone    | Cat#     |        |
|---------------------------------------------------------|------------|----------|----------|--------|
| Mouse and Rabbit Specific HRP/DAB IHC Detection Kit - M | Abcam      | -        | ab236466 |        |
| Recombinant Anti-CD31 antibody                          | Abcam      | EPR17259 | ab182981 | 1/2000 |
| Recombinant Anti-Ki67 antibody                          | Abcam      | SP6      | ab16667  | 1/200  |
| Recombinant Anti-alpha smooth muscle Actin antibody     | Abcam      | EPR5368  | ab124964 | 1/2000 |
| Aqueous mounting medium                                 | Abcam      |          | ab64230  |        |

**Primer sequences**

| Name            | Sequence                |  |
|-----------------|-------------------------|--|
| IL-1 $\beta$ _F | TGGACCTTCCAGGATGAGGACA  |  |
| IL-1 $\beta$ _R | G TTCATCTCGGAGCCTGTAGTG |  |
| VEGF-A_F        | CTGCTGTAACGATGAAGCCCTG  |  |
| VEGF-A_R        | GCTGTAGGAAGCTCATCTCTCC  |  |
| IL-6_F          | TACCACTTCACAAGTCGGAGGC  |  |
| IL-6_R          | CTGCAAGTGCATCATCGTTGTTC |  |
| CXCL1_F         | TCCAGAGCTTGAAGGTGTTGCC  |  |
| CXCL1_R         | AACCAAGGGAGCTTCAGGGTCA  |  |
| CX3CL1_F        | CAGTGGCTTTGCTCATCCGCTA  |  |
| CX3CL1_R        | AGCCTGGTGATCCAGATGCTTC  |  |
| CX3CR1_F        | GAGCATCACTGACATCTACCTCC |  |
| CX3CR1_R        | AGAAGGCAGTCGTGAGCTTGCA  |  |
| CCL2_F          | GCTACAAGAGGATCACCAGCAG  |  |
| CCL2_R          | GTCTGGACCCATTCTTCTTGG   |  |
| CCR2_F          | GCTGTGTTTGCCTCTCTACCAG  |  |
| CCR2_R          | CAAGTAGAGGCAGGATCAGGCT  |  |
| CCL5_F          | CCTGCTGCTTTGCCTACCTCTC  |  |
| CCL5_R          | ACACACTTGGCGGTTCTTCGA   |  |
| CCR5_F          | GTCTACTTTCTCTTCTGGACTCC |  |
| CCR5_R          | CCAAGAGTCTCTGTTGCCTGCA  |  |
| CXCR4_F         | GACTGGCATAGTCGGCAATGGA  |  |
| CXCR4_R         | CAAAGAGGAGGTCAGCCACTGA  |  |
| GM-CSFR_F       | CAGTTTGAGGTCCAGTGGCAGA  |  |
| GM-CSFR_R       | CCAGTGCTTCATCCTCGTGTCG  |  |
| RPL13A_F        | CTGCTCTCAAGGTTGTTCCGGCT |  |
| RPL13A_R        | CCTTCCGTTTCTCCTCCAGAGT  |  |

**Supplemental table 2**

Reagents and antibodies

## **Supplemental materiel**

### **2'-deoxy-2'-[18F]fluoro-D-glucose (FDG) positron emission tomography-computed tomography (PET-CT) imaging**

Prior to each imaging session, mice were fasted overnight with water ad libitum. Mice were anesthetized with isoflurane (IsoVet 100%; Centravet, France) in 100% oxygen (4% isoflurane for induction; 1–2% for maintenance). Mice were weighted, and placed on a heated plate (Minerve, France). Glycemia was measured in blood drawn from the caudal ventral artery using an Accu-Chek® Aviva Nano A (Accu-Chek, France). A customized catheter with a 29 G needle (Fischer Scientific, France) connected to a 5-cm polyethylene tubing (Tygon Microbore Tubing, Cole-Parmer 0.020" × 0.060" OD; Fisher Scientific, France) was installed in the lateral tail vein of the mice. 10 MBq of FDG (Gluscan, Advanced Applied Applications, France) in 200 µl of saline solution were injected in the mice. The mice were then put back in their cages and left awake for 30 min. Mice were anesthetized again and installed in prone position in the imaging bed of the camera (NanoScan PET-CT, Mediso Medical Imaging Systems, Hungary). Respiration and body temperature were registered. Body temperature was maintained at 37°C and anesthesia was controlled on the breathing rate throughout the entire examination. CT scans were performed first using the following parameters: mode semi-circular, tension of 50 kV, 720 projections full scan, 300 ms per projection, binning 1:4. CT data were reconstructed using filtered back projection (filter : Cosine ; cutoff: 100%). List-mode PET data were collected between 45 and 60 min post injection of FDG, binned using a 5-ns time window, a 400- to 600-keV energy window, and a 1:5 coincidence mode. *In vivo* PET acquisitions were reconstructed using the Tera-Tomo reconstruction engine (3D-OSEM based manufactured customized algorithm, Mediso Medical Imaging Systems, Hungary) with expectation maximization iterations, scatter and attenuation corrections. Images were analyzed using the software PMOD (PMOD Technologies LLC, Switzerland). Standardized Volume of Interest (VOI) was drawn in each organ of interest and Standardized Uptake Values (SUV) were calculated by dividing the mean tissue radioactivity concentration by the whole body concentration of the injected radioactivity. The Peak value was calculated as the maximum average SUV within a 1-cm<sup>3</sup> spherical volume of interest and the tumor volume was automatically segmented at 33% of this value. Total FDG uptake was estimated as the product from the volume by the mean uptake of the segmented region.

### ***In vivo* uptake of 2-NBDG and C16 BODIPY**

At day 12-13 after tumor graft, mice were fastened overnight. To test *in vivo* uptake of glucose, mice receive 200µg (iv) of the fluorescent glucose analogue 2-NBDG (2-[N-(7-nitrobenz-2-oxa-1, 3-diazol-4-yl) amino]-2-deoxyglucose) (Life Technologies) 15 min before sacrifice. To test *in vivo* uptake of lipid, mice were injected with 50µg of fluorescent palmitate Bodipy FL C16 (Life Technologies) 1h before sacrifice. Uptake among main immune cells and CD45 negative cells (mostly tumor cells) was analyzed by flow cytometry.

### **Bone marrow supernatant**

Bone marrow supernatants were obtained from mice fed during 2 weeks with HFHCD or CD. The metaphysis of one end tibia was removed; the tibia was centrifugated 6000g 10 min at 4°C ('open end tibia' facing down). Then the bone marrow pellet was resuspended in 100 µl PBS-BSA 0.5%, mixed, then centrifugated down again. Collected supernatants were stored at -80°C for Luminex assay.

### **Bone marrow HSPC isolation**

Bone marrow cells were flushed from femur and tibia of mice fed during 2 weeks with HFHCD or CD, by using a syringe 23 gauge needle filled with PBS. Cell suspension was prepared by passing through a 70 µm mesh nylon strainer. Then hematopoietic progenitors cells (HSPC) were isolated with EasySep™ Mouse Hematopoietic Progenitor Cell Isolation Kit (Stem Cell), and lysed in RLT buffer (Qiagen).
